# Supplementary material for: Nitrogen-fixing symbiotic bacteria act as a global filter for plant establishment on islands
Source: PubMed Central journal article supplement (PMC9649727; doi:10.1038/s42003-022-04133-x), 2022-11-10
Supplement: 42003_2022_4133_MOESM1_ESM.pdf [file 42003_2022_4133_MOESM1_ESM.pdf]

## Supplementary Information for

### Nitrogen-fixing symbiotic bacteria act as a global filter for plant establishment on islands

#### Supplementary Table 1. N-fixing plant species proportion by land type.

Model results of GLMs conducted with angiosperm species in the dataset, showing the model results from the broad model testing whether proportion N-fixing plant species differs between land type (mainland versus island; N = 1,005). Random effect results are reported below fixed effects.

|                           | Estimate | Std. Error | z -value  | p-value   |
|---------------------------|----------|------------|-----------|-----------|
| (Intercept)               | -2.491   | 0.023      | -108.368  | <2.00E-16 |
| landtype (nonoceanic)     | -0.219   | 0.047      | -4.675    | 2.94E-06  |
| landtype (oceanic)        | -0.242   | 0.046      | -5.285    | 1.26E-07  |
| absolute latitude         | 0.189    | 0.044      | 4.345     | 1.40E-05  |
| squared latitude          | -0.097   | 0.051      | -1.899    | 0.058     |
| area                      | -0.029   | 0.028      | -1.046    | 0.296     |
| elevational range         | 0.022    | 0.026      | 0.859     | 0.390     |
| mean annual precipitation | -0.165   | 0.015      | -10.943   | <2.00E-16 |
| mean annual temperature   | 0.404    | 0.030      | 13.318    | <2.00E-16 |
|                           |          |            |           |           |
| random effect             | Variance |            | Std. Dev. |           |
| land type:location        | 0.093    |            | 0.305     |           |

#### Supplementary Table 2. Island presence N-fixing plant species.

Model results of GLMs conducted with angiosperm species in the dataset, showing the model results from the island only models, testing drivers of presence of N-fixing plant species (N = 326).

|                                  | Estimate | Std. Error | z -value | p-value  |
|----------------------------------|----------|------------|----------|----------|
| (Intercept)                      | 4.928    | 0.676      | 7.285    | 3.21E-13 |
| absolute latitude                | 1.280    | 1.021      | 1.253    | 0.210    |
| squared latitude                 | 0.598    | 1.846      | 0.324    | 0.746    |
| area                             | 2.098    | 0.533      | 3.937    | 8.26E-05 |
| elevational range                | 1.355    | 0.488      | 2.775    | 0.006    |
| mean annual precipitation        | 2.414    | 0.565      | 4.272    | 1.94E-05 |
| mean annual temperature          | 3.108    | 1.280      | 2.428    | 0.015    |
| distance                         | -1.492   | 0.353      | -4.227   | 2.37E-05 |
| spatial autocorrelation variable | -0.050   | 0.632      | -0.079   | 0.937    |

**Supplementary Table 3. Island proportion N-fixing plant species.**

Model results of GLMs conducted with angiosperm species in the dataset, showing the model results from the island only models, testing drivers of proportion of N-fixing plant species (N = 288).

|                                  | Estimate | Std. Error | z -value | p-value   |
|----------------------------------|----------|------------|----------|-----------|
| (Intercept)                      | -2.593   | 0.023      | -110.693 | <2.00E-16 |
| absolute latitude                | 0.066    | 0.065      | 1.011    | 0.312     |
| squared latitude                 | -0.271   | 0.106      | -2.546   | 0.011     |
| area                             | -0.170   | 0.025      | -6.755   | 1.43E-11  |
| elevational range                | 0.027    | 0.034      | 0.806    | 0.420     |
| mean annual precipitation        | -0.110   | 0.020      | -5.631   | 1.80E-08  |
| mean annual temperature          | 0.062    | 0.061      | 1.026    | 0.305     |
| distance                         | -0.025   | 0.024      | -1.033   | 3.02E-01  |
| area*distance                    | -0.114   | 0.022      | -5.195   | 2.05E-07  |
| spatial autocorrelation variable | 0.223    | 0.015      | 14.920   | <2.00E-16 |

**Supplementary Table 4. Co-limitation by mycorrhizal fungi and N-fixing bacteria.**

Model results of GLMs conducted with angiosperm species in the dataset, showing the model results testing for co-limitation by mycorrhizal fungi and bacteria (synergism) by testing for a three-way interaction between mycorrhizal status, N-fixing status and land type in predicting species counts (N = 5,117). Random effect results are reported below fixed effects

|                                             | Estimate | Std. Error | z -value  | p-value   |
|---------------------------------------------|----------|------------|-----------|-----------|
| (Intercept)                                 | 6.057    | 0.054      | 112.638   | <2.00E-16 |
| N-fixing (N-fix)                            | -3.209   | 0.034      | -93.741   | <2.00E-16 |
| mycorrhizal (NM)                            | 0.817    | 0.034      | 24.234    | <2.00E-16 |
| landtype (non-oceanic)                      | -2.933   | 0.092      | -32.023   | <2.00E-16 |
| landtype (oceanic)                          | -2.961   | 0.087      | -33.930   | <2.00E-16 |
| N-fixing*mycorrhizal                        | 1.279    | 0.038      | 33.319    | <2.00E-16 |
| N-fixing*landtype (non- oceanic)            | 0.277    | 0.095      | 2.921     | 0.003     |
| N-fixing*landtype (oceanic)                 | 0.021    | 0.101      | 0.210     | 0.834     |
| mycorrhizal*landtype (non- oceanic)         | -0.092   | 0.061      | -1.505    | 0.132     |
| mycorrhizal*landtype (oceanic)              | 0.179    | 0.056      | 3.189     | 0.001     |
| N-fixing*mycorrhizal*landtype (non-oceanic) | -0.029   | 0.100      | -0.286    | 0.775     |
| N-fixing*mycorrhizal*landtype (oceanic)     | 0.137    | 0.105      | 1.295     | 0.195     |
| random effect                               | Variance |            | Std. Dev. |           |
| land type:location:N-fixing:mycorrhizal     | 0.173    |            | 0.416     |           |

|                                |       |       |
|--------------------------------|-------|-------|
| land type:location:mycorrhizal | 0.118 | 0.344 |
| land type:location:N-fixing    | 0.097 | 0.311 |
| land type:entity_ID            | 1.097 | 1.047 |

**Supplementary Table 5. Drivers of proportion endemic plant species on islands.**

Model results of GLMs conducted with angiosperm species in the dataset, showing the model results from the island model testing drivers of proportion endemic plant species (N = 169).

|                                  | Estimate | Std. Error | z -value | p-value   |
|----------------------------------|----------|------------|----------|-----------|
| (Intercept)                      | -3.071   | 0.152      | -20.208  | <2.00E-16 |
| absolute latitude                | 1.499    | 0.078      | 19.211   | <2.00E-16 |
| squared latitude                 | -2.269   | 0.122      | -18.532  | <2.00E-16 |
| area                             | -0.667   | 0.179      | -3.727   | 0.000     |
| elevational range                | -0.200   | 0.038      | -5.304   | 1.14E-07  |
| mean annual precipitation        | 0.299    | 0.025      | 12.086   | <2.00E-16 |
| mean annual temperature          | -1.113   | 0.058      | -19.193  | <2.00E-16 |
| distance                         | -0.004   | 0.151      | -0.028   | 9.78E-01  |
| nitrogen fixing status           | 0.785    | 0.154      | 5.103    | 3.34E-07  |
| nitrogen fixing status*distance  | 0.169    | 0.152      | 1.113    | 0.266     |
| nitrogen fixing status*area      | 1.264    | 0.179      | 7.054    | 1.74E-12  |
| spatial autocorrelation variable | 0.236    | 0.005      | 50.350   | <2.00E-16 |

**Supplementary Table 6. N-fixing legume species proportion by land type.**

Model results of GLM conducted with only legume species in the dataset, showing the model results from the broad model testing whether proportion N-fixing legume species differs between land type (N = 807). Random effect results are reported below fixed effects.

|                           | Estimate | Std. Error | z-value | p-value   |
|---------------------------|----------|------------|---------|-----------|
| (Intercept)               | 2.331    | 0.028      | 82.838  | <2.00E-16 |
| landtype (nonoceanic)     | 0.232    | 0.075      | 3.106   | 0.002     |
| landtype (oceanic)        | -0.114   | 0.072      | -1.575  | 0.115     |
| absolute latitude         | -0.051   | 0.067      | -0.753  | 0.451     |
| squared latitude          | 0.662    | 0.088      | 7.523   | 5.36E-14  |
| area                      | -0.052   | 0.032      | -1.609  | 0.108     |
| elevational range         | 0.206    | 0.029      | 7.109   | 1.17E-12  |
| mean annual precipitation | -0.098   | 0.021      | -4.649  | 3.33E-06  |
| mean annual temperature   | 0.164    | 0.040      | 4.067   | 4.76E-05  |
| random effect             |          | Variance   |         | Std. Dev. |

|                    |       |       |
|--------------------|-------|-------|
| land type:location | 0.032 | 0.178 |
|--------------------|-------|-------|

**Supplementary Table 7. Island proportion N-fixing legume species.**

Model results of GLM conducted with only legume species in the dataset, showing the model results from the island only models, testing drivers of proportion of N-fixing legume species (N = 200).

|                                  | Estimate | Std. Error | z-value | p-value   |
|----------------------------------|----------|------------|---------|-----------|
| (Intercept)                      | 1.793    | 0.058      | 30.919  | <2.00E-16 |
| absolute latitude                | 0.440    | 0.226      | 1.950   | 0.051     |
| squared latitude                 | -0.425   | 0.378      | -1.125  | 0.261     |
| area                             | 0.103    | 0.065      | 1.579   | 0.114     |
| elevational range                | 0.193    | 0.079      | 2.452   | 0.014     |
| mean annual precipitation        | -0.040   | 0.058      | -0.679  | 0.497     |
| mean annual temperature          | -0.046   | 0.199      | -0.230  | 0.818     |
| distance                         | -0.035   | 0.063      | -0.558  | 0.577     |
| spatial autocorrelation variable | 0.679    | 0.098      | 6.898   | 5.28E-12  |

**Supplementary Table 8. Drivers of proportion endemic legume species on islands.**

Model results of GLM conducted with only legume species in the dataset, showing the model results from the island model testing drivers of proportion endemic legume species (N =70).

|                                  | Estimate | Std. Error | z-value | p-value   |
|----------------------------------|----------|------------|---------|-----------|
| (Intercept)                      | -2.684   | 0.153      | -17.570 | <2.00E-16 |
| absolute latitude                | 1.756    | 0.978      | 1.795   | 0.073     |
| squared latitude                 | -0.849   | 1.005      | -0.844  | 0.398     |
| area                             | 0.878    | 0.153      | 5.753   | 8.78E-09  |
| elevational range                | 0.601    | 0.191      | 3.145   | 0.002     |
| mean annual precipitation        | -0.292   | 0.173      | -1.687  | 0.092     |
| mean annual temperature          | 0.646    | 0.350      | 1.844   | 0.065     |
| distance                         | -0.018   | 0.178      | -0.099  | 0.921     |
| nitrogen fixing status           | 1.608    | 0.266      | 6.035   | 1.59E-09  |
| nitrogen fixing status*distance  | 0.187    | 0.253      | 0.741   | 0.459     |
| nitrogen fixing status*area      | -0.910   | 0.237      | -3.839  | 1.24E-04  |
| spatial autocorrelation variable | 0.492    | 0.096      | 5.097   | 3.45E-07  |

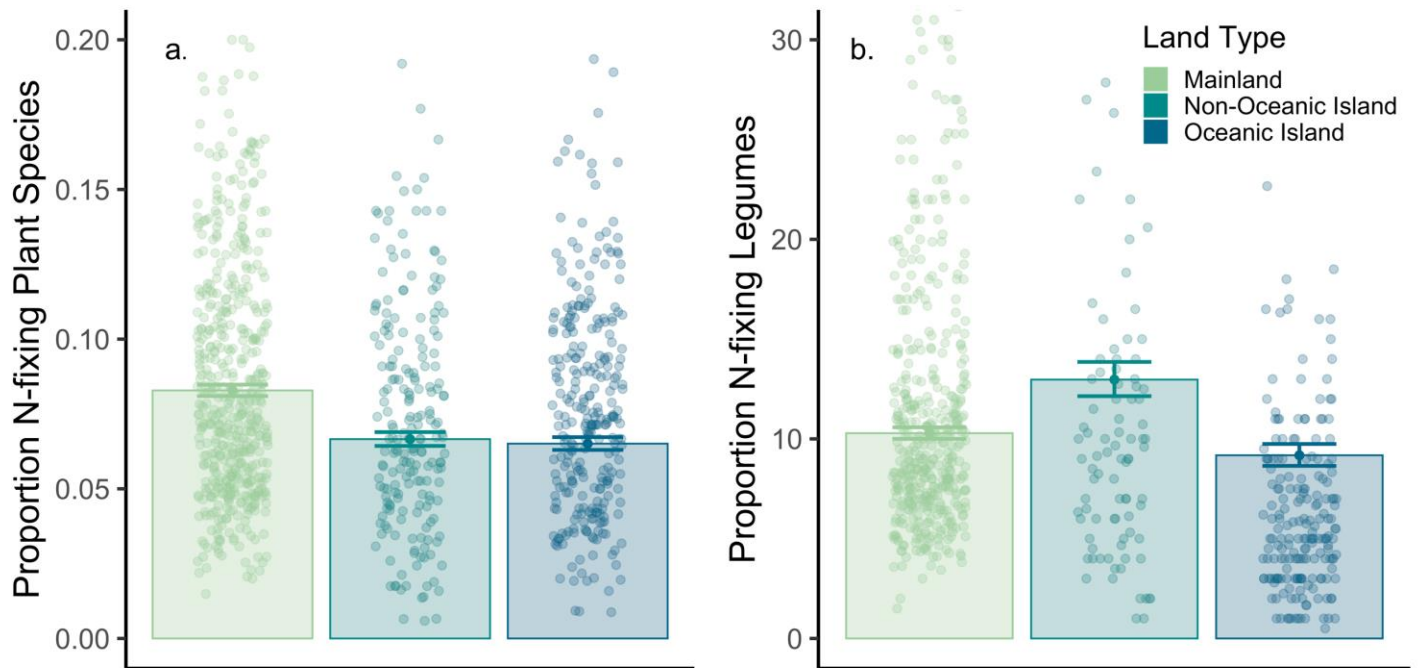

**Supplementary Figure 1. N-fixing plant species are underrepresented on islands.**

The proportion of N-fixing plant species is significantly lower on islands compared to mainlands for all vascular plant species (a, oceanic and non-oceanic island  $p < 0.001$ ,  $N = 1,005$ ). Within legumes, the proportion N-fixing plant species is higher on non-oceanic islands, and insignificantly lower on oceanic islands (b, non-oceanic  $p < 0.001$ , oceanic  $p = 0.115$ ,  $N = 807$ ). Error bars represent standard errors.

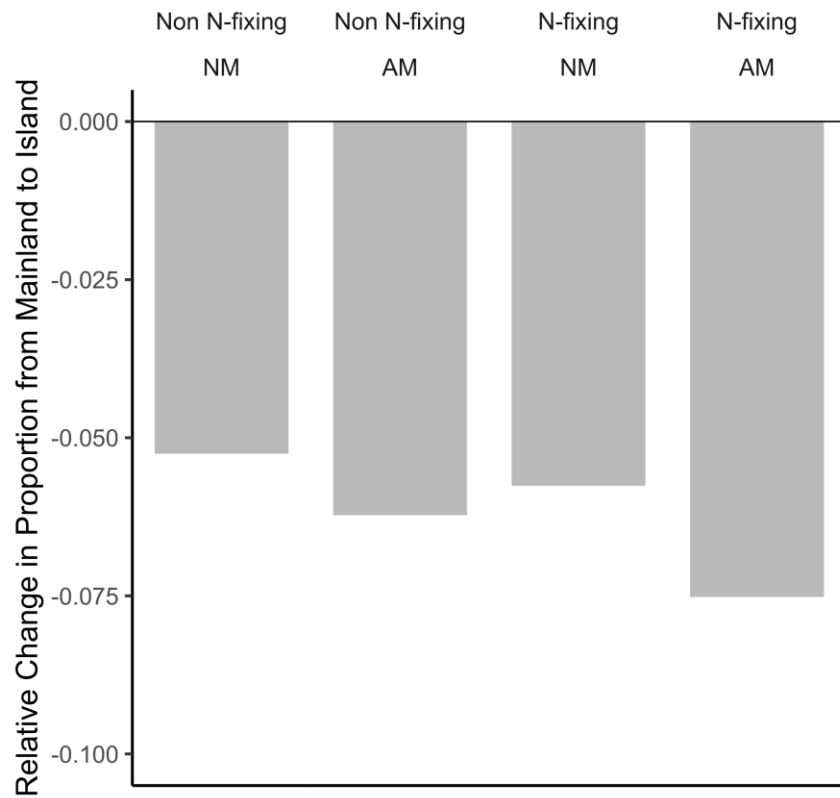

**Supplementary Figure 2. Test for synergism in mycorrhizal and n-fixing filter on island plant establishment.**

Our test for synergism showed no evidence that plants that associate with both symbiont types are more strongly limited than expected from the two filters ( $p = 0.20$ ,  $N = 5,117$ ).

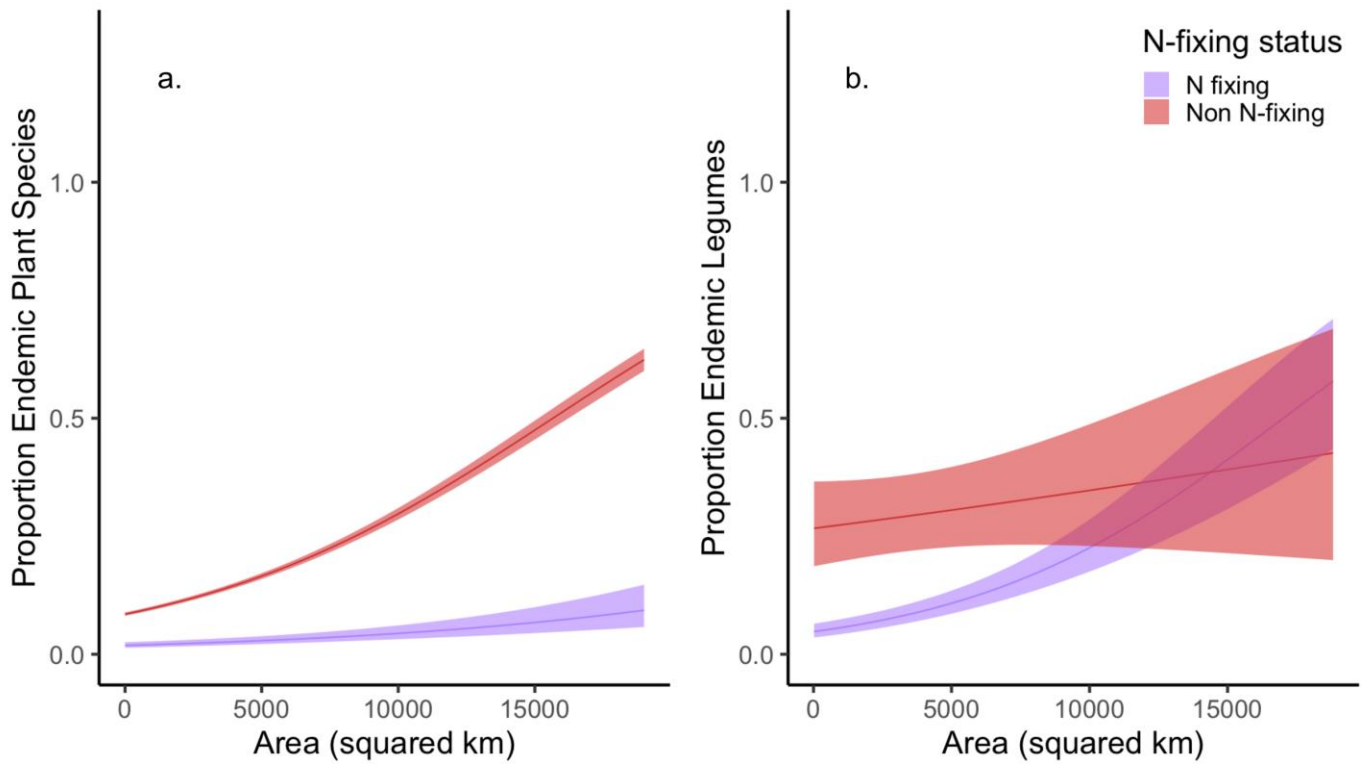

**Supplementary Figure 3. Endemism patterns across island area.**

For all vascular plant species (a,  $N = 169$ ), the proportion of endemic plant species increases with increasing island area, with the increase stronger for non N-fixing plant species. For legume plant species (b,  $N = 170$ ), the proportion endemic plant species increases with increasing island area, with the increase stronger for N-fixing plant species. Confidence bands represent 95% confidence intervals.
