# Supplementary material for: Nitrogen-fixing symbiotic bacteria act as a global filter for plant establishment on islands
Source: PubMed Central journal article supplement (PMC9649727; doi:10.1038/s42003-022-04133-x), 2022-11-10
Supplement: 42003_2022_4133_MOESM2_ESM.pdf [file 42003_2022_4133_MOESM2_ESM.pdf]

## **Description of Additional Supplementary Files**

### **Supplementary Data 1. Source data behind graphs in paper.**

This includes data necessary to create all figures in main text (Figures 1 and 2) and Supplementary figures (Supplementary Figures 1-3).
